# Supplementary material for: Electrospun sandwich configuration nanofibers as transparent membranes for skin care drug delivery systems
Source: Springer Nature journal article supplement (doi:10.1007/s10853-018-2241-4), 2018-04-25
Supplement: MOESM1 [file 15723232]

**Supporting Information**


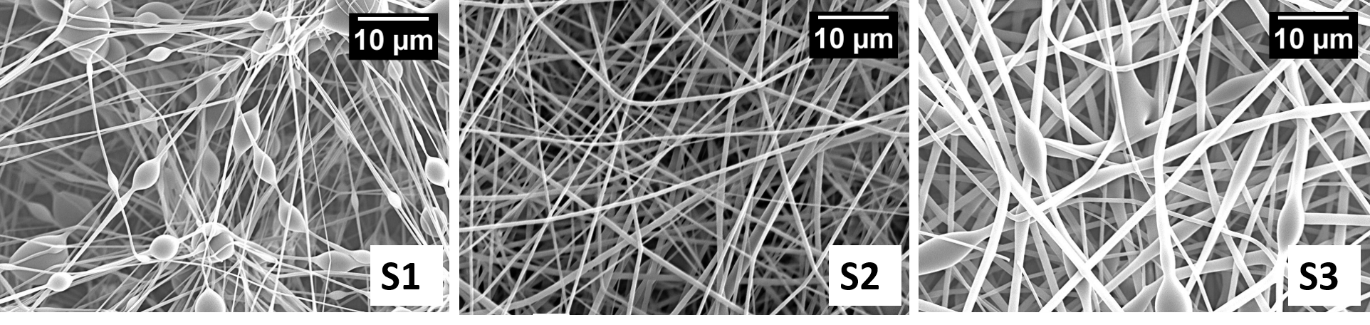


Fig. S1-3† . SEM image of 55, 65, and 75wv% shellac nanofiber.





Fig. S4† XRD patterns of PCL nanofibers before and after treatment.





Fig. S5† XRD patterns of samples before and after treatment.

Fig. S6† Calibration curve of salicylic acid.
